# Supplementary material
Source: PubMed Central journal article supplement (PMC3672297)
Supplement: auto-9-881-s01.pdf [file auto-9-881-s01.pdf]

## **Supplemental Material to:**

**Virginie M.S. Betin, Belinda B.K. Singleton,  
Stephen F. Parsons, David J. Anstee and Jon D. Lane**

**Autophagy facilitates organelle clearance  
during differentiation of human erythroblasts:  
Evidence for a role for ATG4 paralogs during  
autophagosome maturation**

**Autophagy 2013; 9(6)**

**<http://dx.doi.org/10.4161/auto.24172>**

**[www.landesbioscience.com/journals/autophagy/article/24172](http://www.landesbioscience.com/journals/autophagy/article/24172)**

**Supplemental Table 1: Primer design and conditions for RT-PCR**

|                                | Primer name        | Target                                 | Primer sequence         | %GC  | PCR product | Genbank ref                      | Primers (nM) | Annealing temp |
|--------------------------------|--------------------|----------------------------------------|-------------------------|------|-------------|----------------------------------|--------------|----------------|
| <i>General Autophagy Genes</i> | RT-PABPC1 For      | Poly(A) binding protein, cytoplasmic 1 | agctgtccaacacctgaatc    | 50   | 101 bp      | NM_002568                        | 300 nM       | 60°C           |
|                                | RT-PABPC1 Rev      | Poly(A) binding protein, cytoplasmic 1 | ggatagatgcagcagcggttctg | 52   |             |                                  |              |                |
|                                | RT-Becn1-For       | BECN1                                  | agggtgagaaagcgagaca     | 50   | 196 bp      | NM_003766                        | 300 nM       | 60°C           |
|                                | RT-Becn1-Rev       | BECN1                                  | aattgtgaggacaccaagc     | 50   |             |                                  |              |                |
|                                | RT-Atg5-For        | Atg5                                   | aagcaactctggatgggattg   | 50   | 236 bp      | NM_004849                        | 150 nM       | 60°C           |
|                                | Rt-Atg5-Rev        | Atg5                                   | caggatcaatagcagaaggac   | 48   |             |                                  |              |                |
|                                | RT-Bnip3-For       | BNIP3                                  | gctcctgggtagaactgcac    | 60   | 190 bp      | NM_004052                        | 200 nM       | 58°C           |
|                                | RT-Bnip3-Rev       | BNIP3                                  | gccctgttgatcttctgtgg    | 55   |             |                                  |              |                |
|                                | RT-Ulk 1-For       | ULK1                                   | ggaagatgtctctgggtgga    | 55   | 223 bp      | NM_003565                        | 300 nM       | 60°C           |
|                                | RT-Ulk 1-Rev       | ULK1                                   | acgacgtgcaagtcagacag    | 55   |             |                                  |              |                |
|                                | RT-Nix-For         | BNIP3L                                 | ccctgcacaacaacaacaac    | 50   | 173 bp      | NM_004331.2                      | 150 nM       | 58°C           |
|                                | RT-Nix-Rev         | BNIP3L                                 | attgtggatggaggatgagg    | 50   |             |                                  |              |                |
| <i>Human Atg8 Paralogs</i>     | RT-LC3B For        | MAP1LC3B                               | accatgtcaacatgagtgagc   | 47.6 | 207 bp      | NM_022818                        | 300 nM       | 60°C           |
|                                | RT-LC3B Rev        | MAP1LC3B                               | ctgacaatttcatcccgaacg   | 47.6 |             |                                  |              |                |
|                                | RT-GATE-16/GP-L2 F | GABARAPL2                              | cacagatgcgtggaatccgc    | 60   | 233 bp      | NM_007285                        | 300 nM       | 60°C           |
|                                | RT-GATE-16/GP-L2 R | GABARAPL2                              | gttaggctggactgtgggac    | 60   |             |                                  |              |                |
|                                | RT-GABARAPL1 For   | GABARAPL1                              | ccccgtgattgtagagaagg    | 55   | 171 bp      | NM_031412                        | 300 nM       | 60°C           |
|                                | RT-GABARAPL1 Rev   | GABARAPL1                              | ggagggatgggtgttgac      | 55   |             |                                  |              |                |
|                                | RT-GABARAP For     | GABARAP                                | gaagcgcgctctgag         | 68.8 | 182 bp      | NM_007278                        | 150 nM       | 58°C           |
|                                | RT-GABARAP Rev2    | GABARAP                                | cagctcggagatgaattcg     | 52.6 |             |                                  |              |                |
| <i>Human Atg4 Paralogs</i>     | RT-4Av1+2-For      | Atg4A                                  | ctgcagtccccacagcg       | 70   | 217 bp      | NM_052936 (v1)<br>NM_178270 (v2) | 150 nM       | 60°C           |
|                                | RT-4Av1+2-Rev      | Atg4A                                  | ccccagtggtgtcactct      | 55   |             |                                  |              |                |
|                                | RT-4Bv1-For        | Atg4B                                  | ggtgccagcaagcaaaaag     | 50   | 152 bp      | NM_013325                        | 300 nM       | 60°C           |
|                                | RT-4Bv1-Rev        | Atg4B                                  | gtcgaagaatcttccagtcg    | 47.6 |             |                                  |              |                |
|                                | RT-4Bv2-For        | Atg4B                                  | gacttcaatgattgtgccagc   | 50   | 149 bp      | NM_178326                        | 150 nM       | 60°C           |
|                                | RT-4Bv2-Rev        | Atg4B                                  | atctggacttggcagctctc    | 55   |             |                                  |              |                |
|                                | RT-4C-2For         | Atg4C                                  | cagctgtggtgtctcacatt    | 50   | 222 bp      | NM_178221<br>(variants 7&8)      | 150 nM       | 60°C           |
|                                | RT-4C-2Rev         | Atg4C                                  | ctaagtagtcggtgttggttc   | 48   |             |                                  |              |                |
|                                | RT-4D-4For         | Atg4D                                  | ccgcgacactcactgtactt    | 55   | 202 bp      | NM_032885                        | 300 nM       | 60°C           |
|                                | RT-4D-4Rev         | Atg4D                                  | actcctctctctccagca      | 55   |             |                                  |              |                |
| <i>Control Genes</i>           | RT-Actin B For     | ACTB                                   | catcaccattggcaatgagc    | 47.4 | 282 bp      | NM_001101                        | 300 nM       | 60°C           |
|                                | RT-Actin B Rev     | ACTB                                   | ccacacggagtacttgcgc     | 63.2 |             |                                  |              |                |
|                                | RT-CD71-For        | TFRC                                   | aaaatccggtaggcacag      | 50   | 181 bp      | NM_003234.2                      | 500 nM       | 58°C           |
|                                | RT-CD71-Rev        | TFRC                                   | ctttaaatacaggacgaaagg   | 45   |             |                                  |              |                |

Betin et al. Supplementary Fig. 1

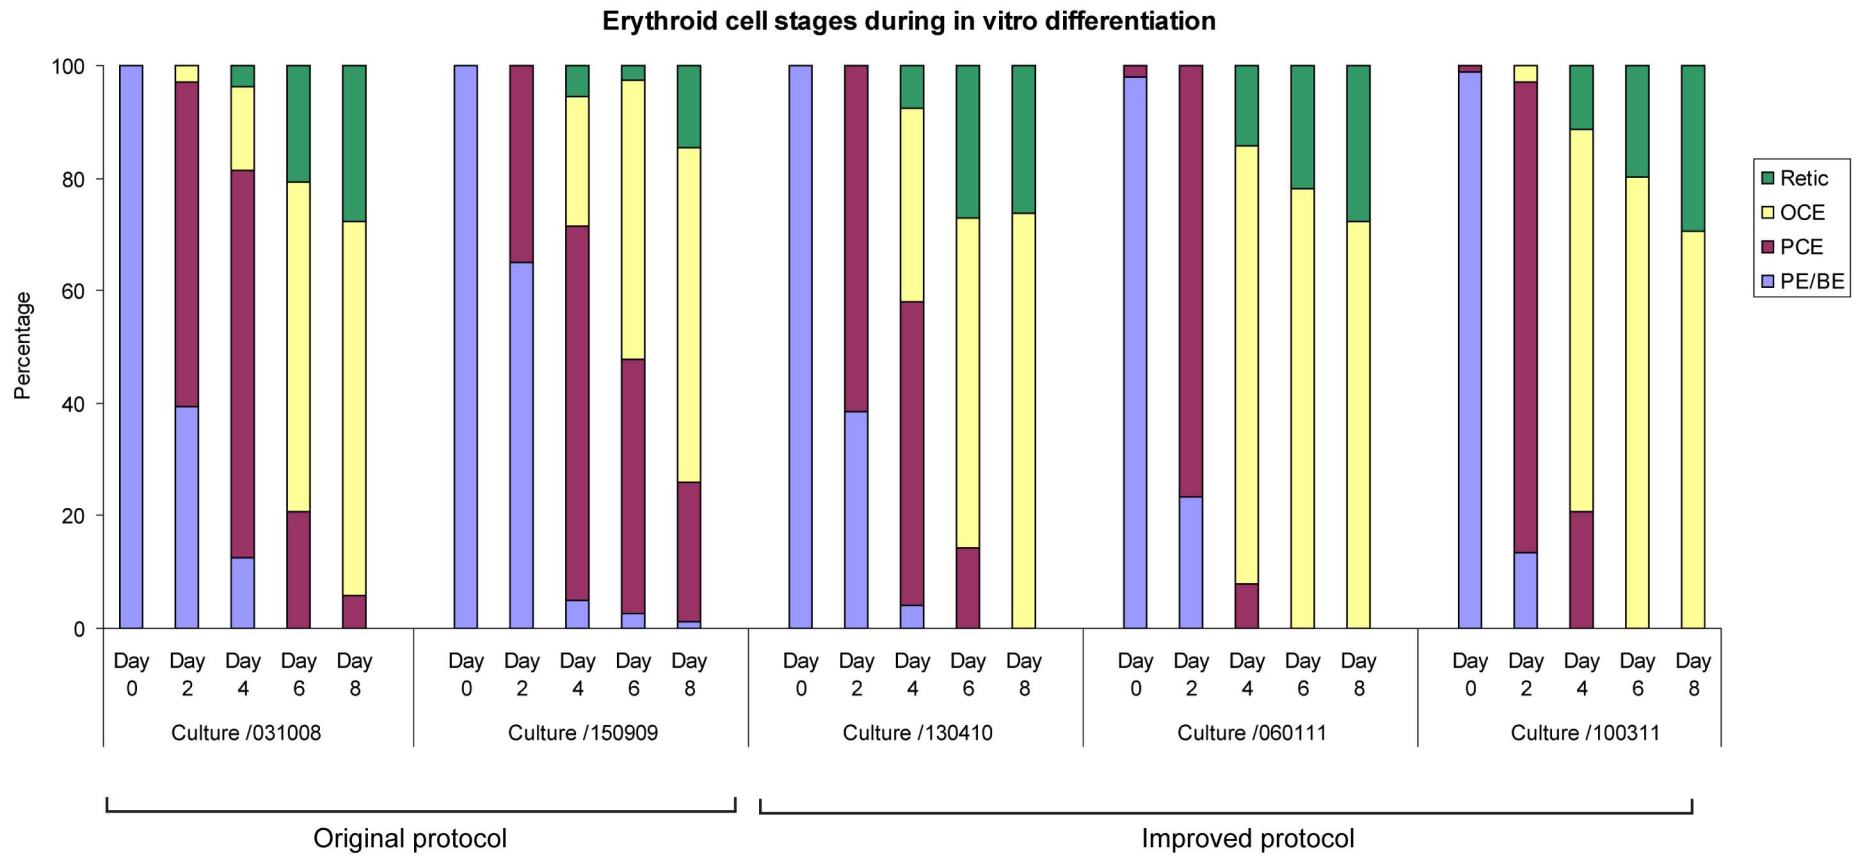

Betin et al. Supplementary Fig. 2

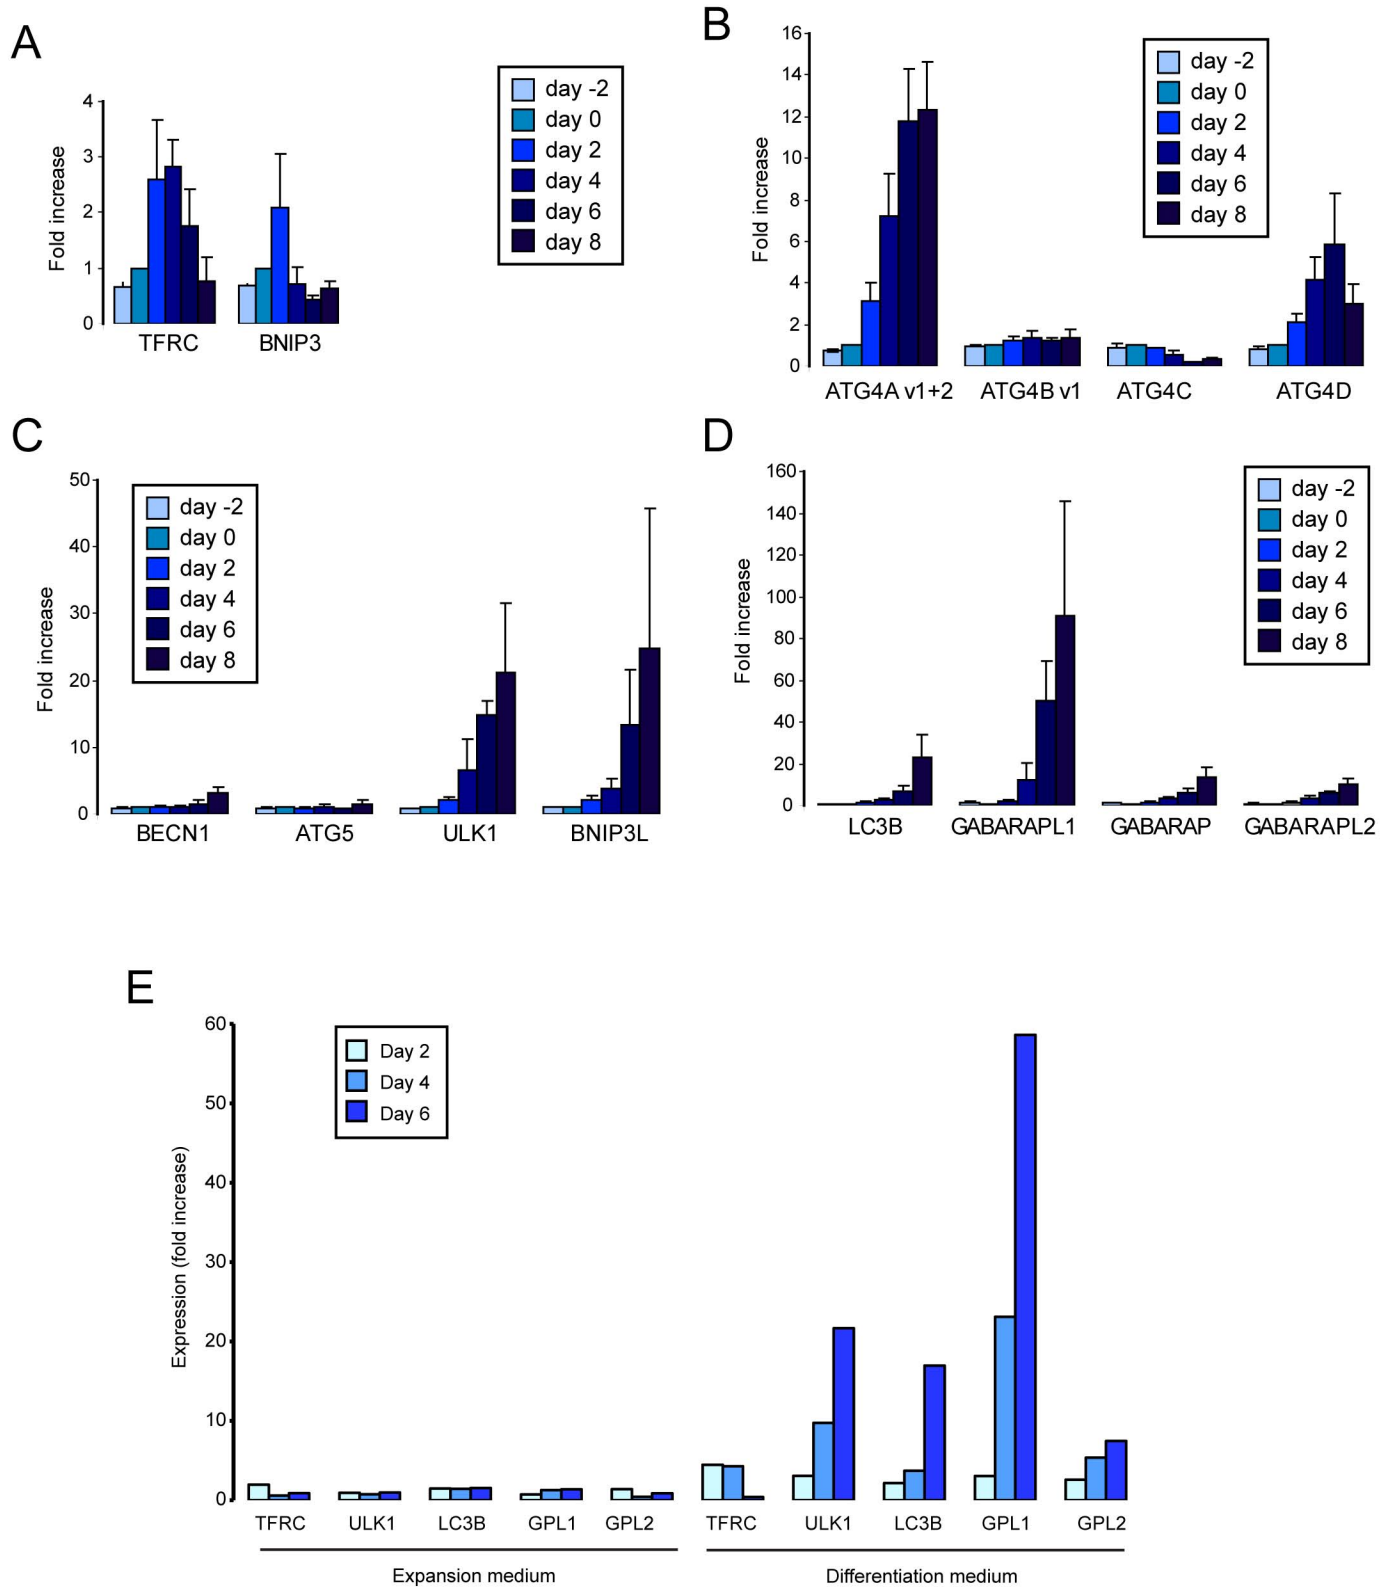

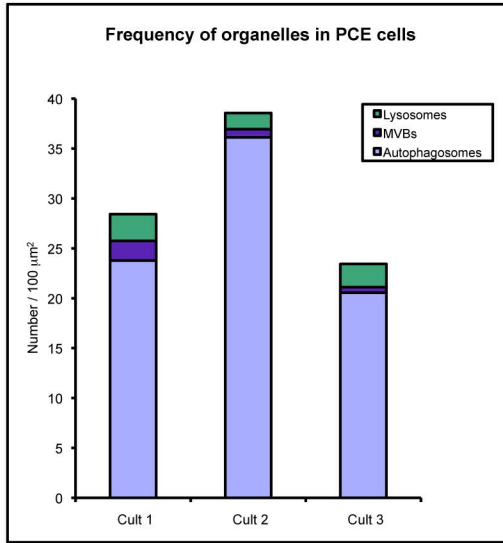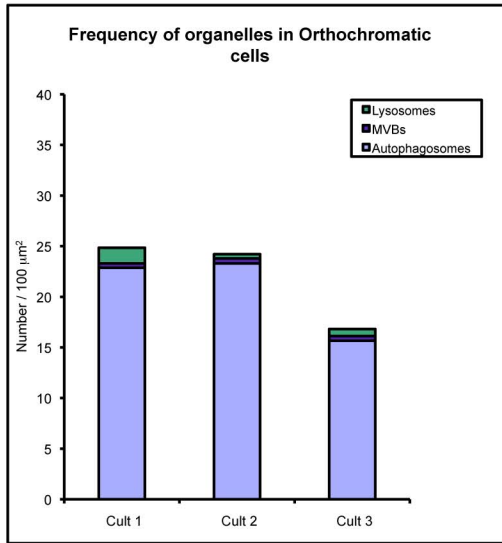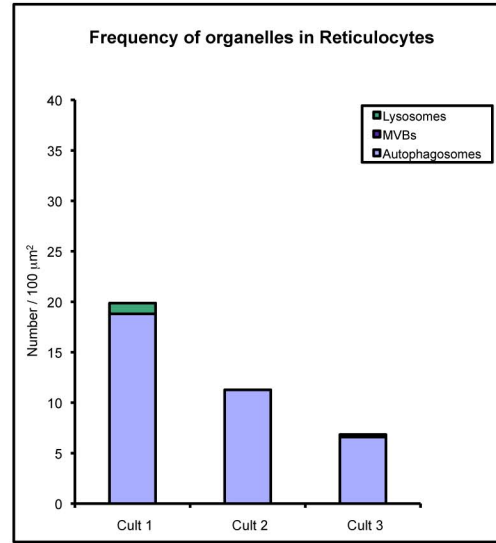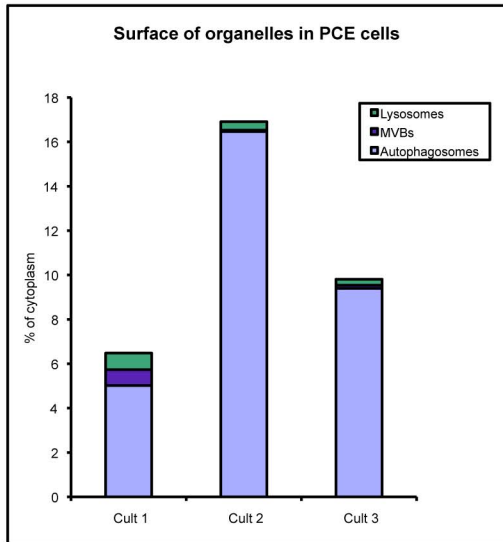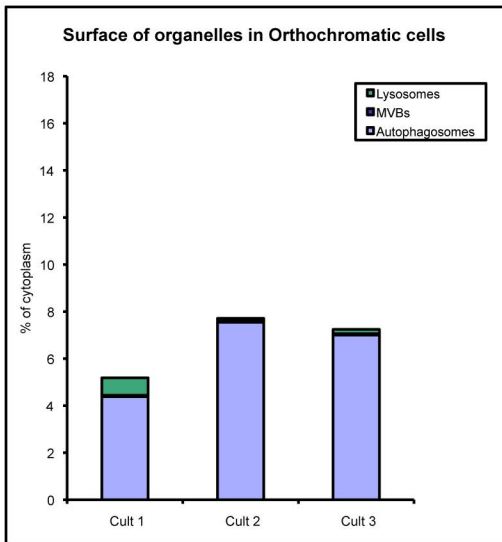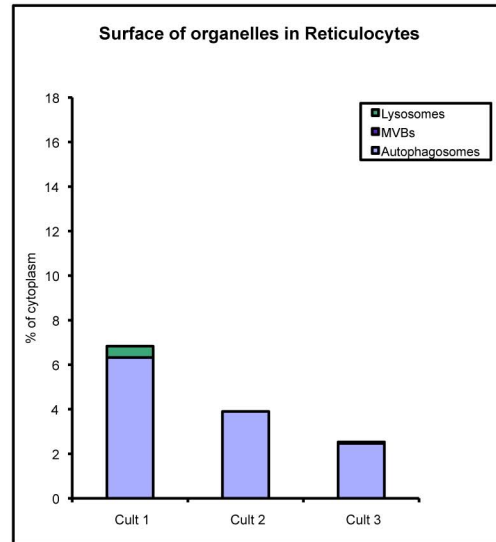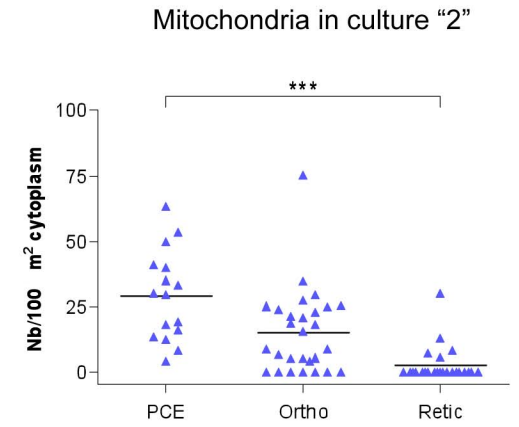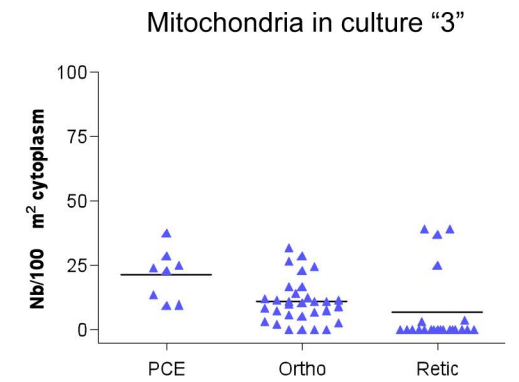

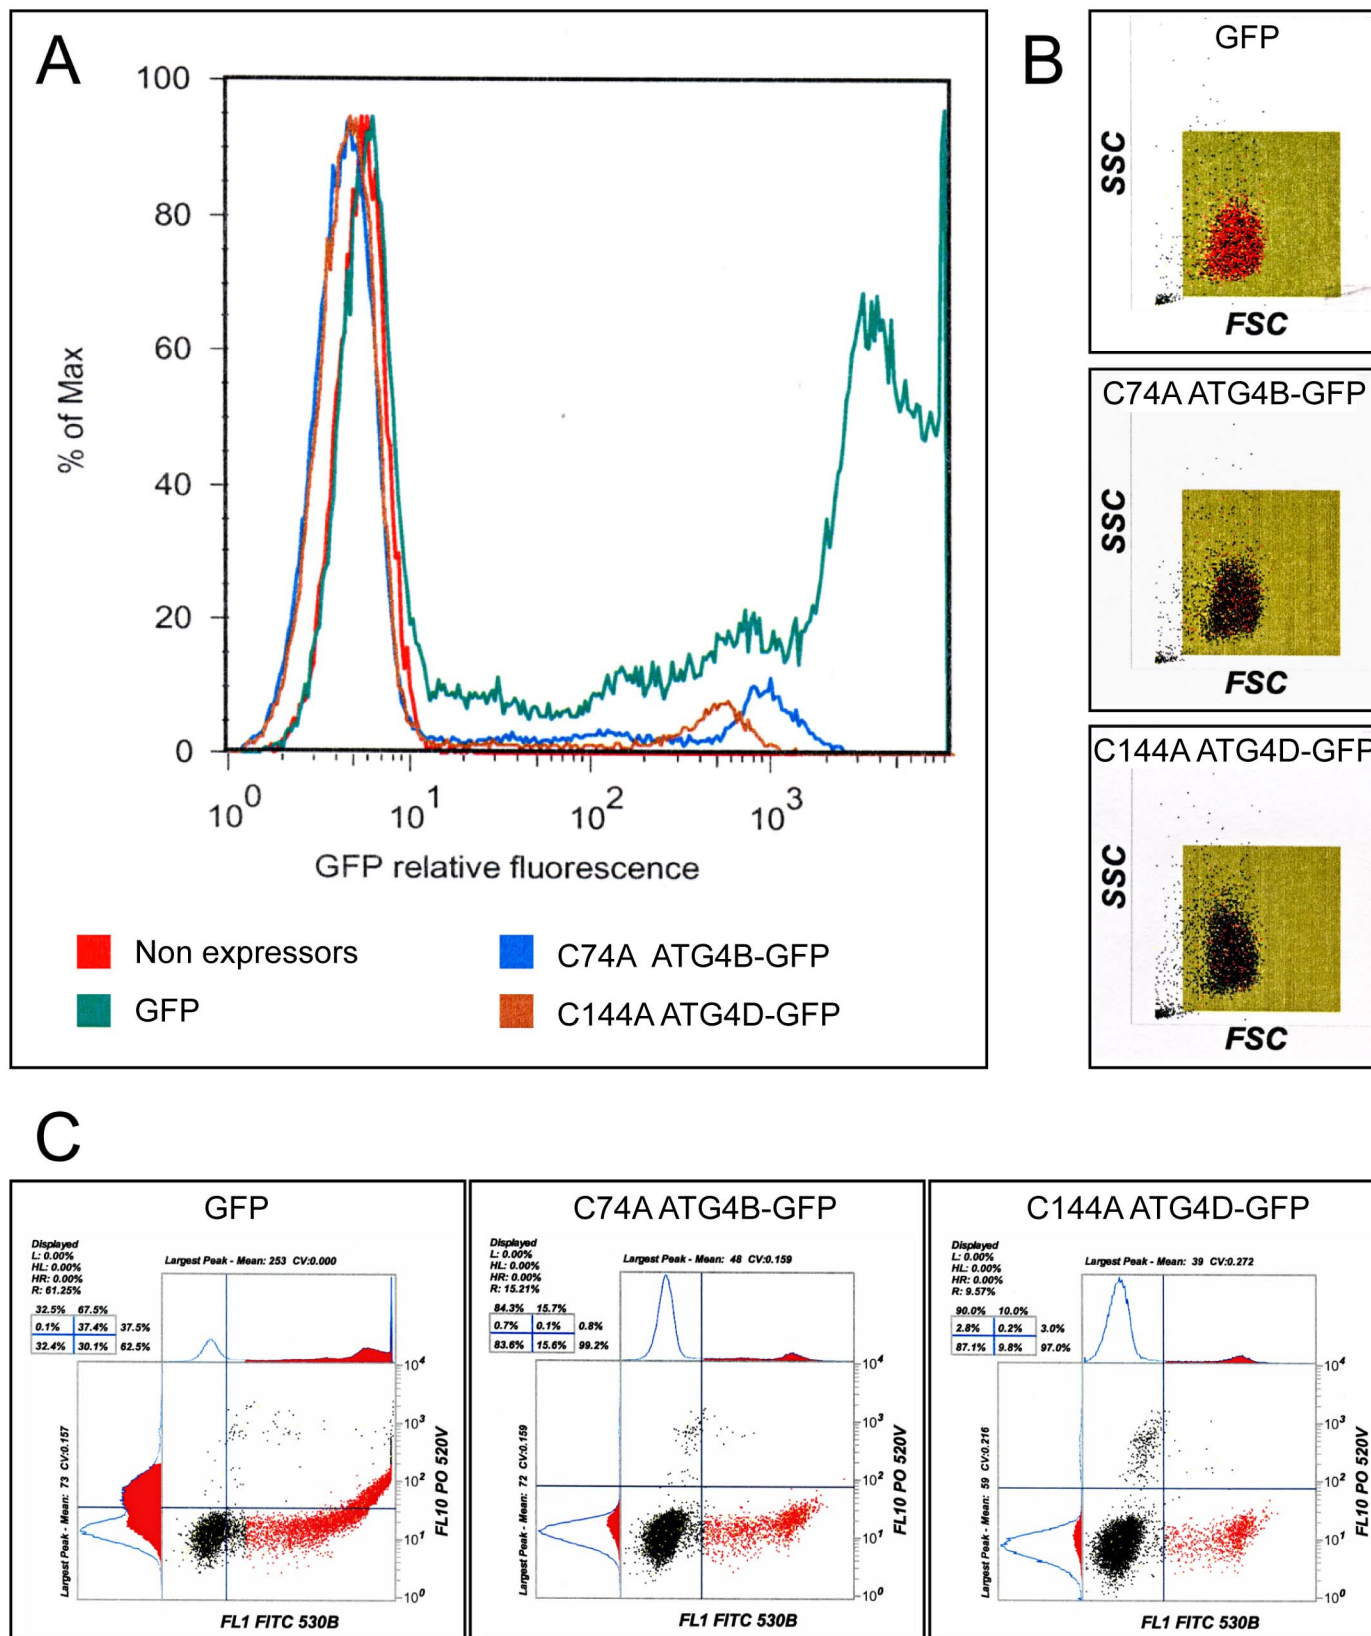

### A Cell surface area

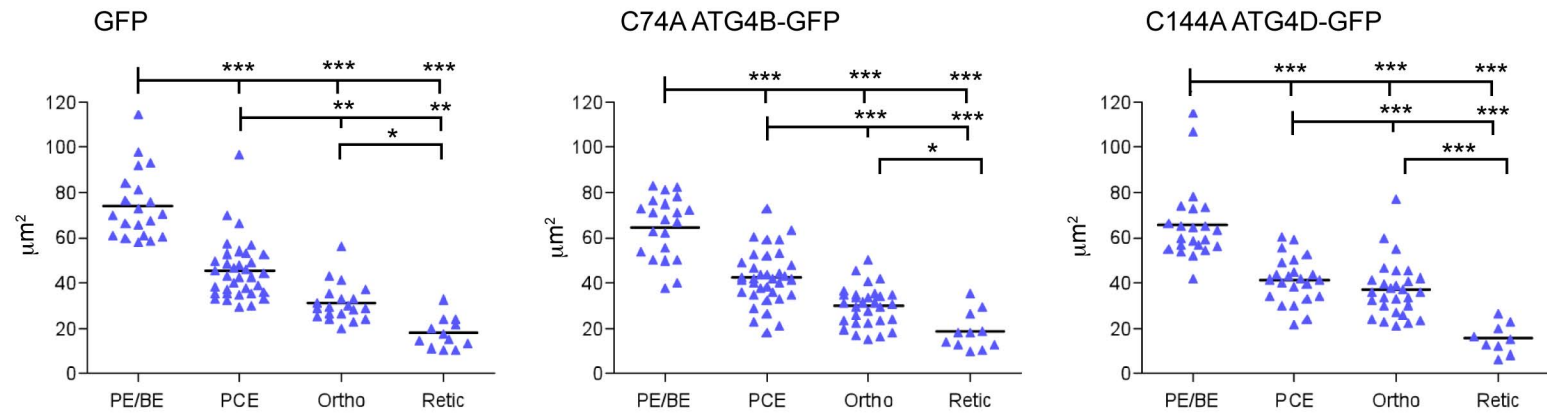

### B Endocytic pit density

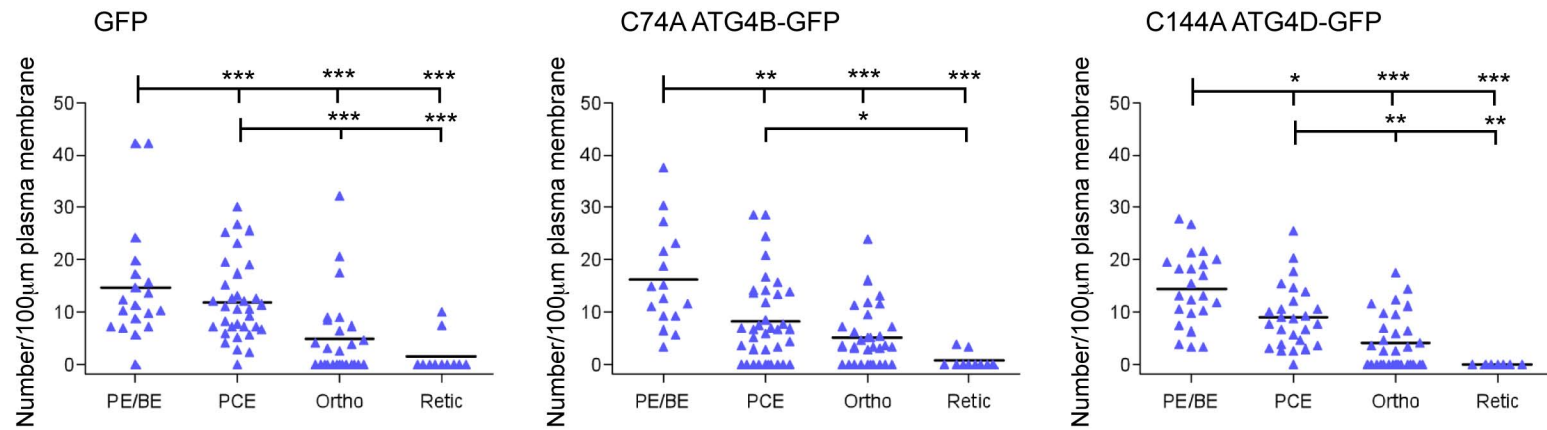

## Amphisomes

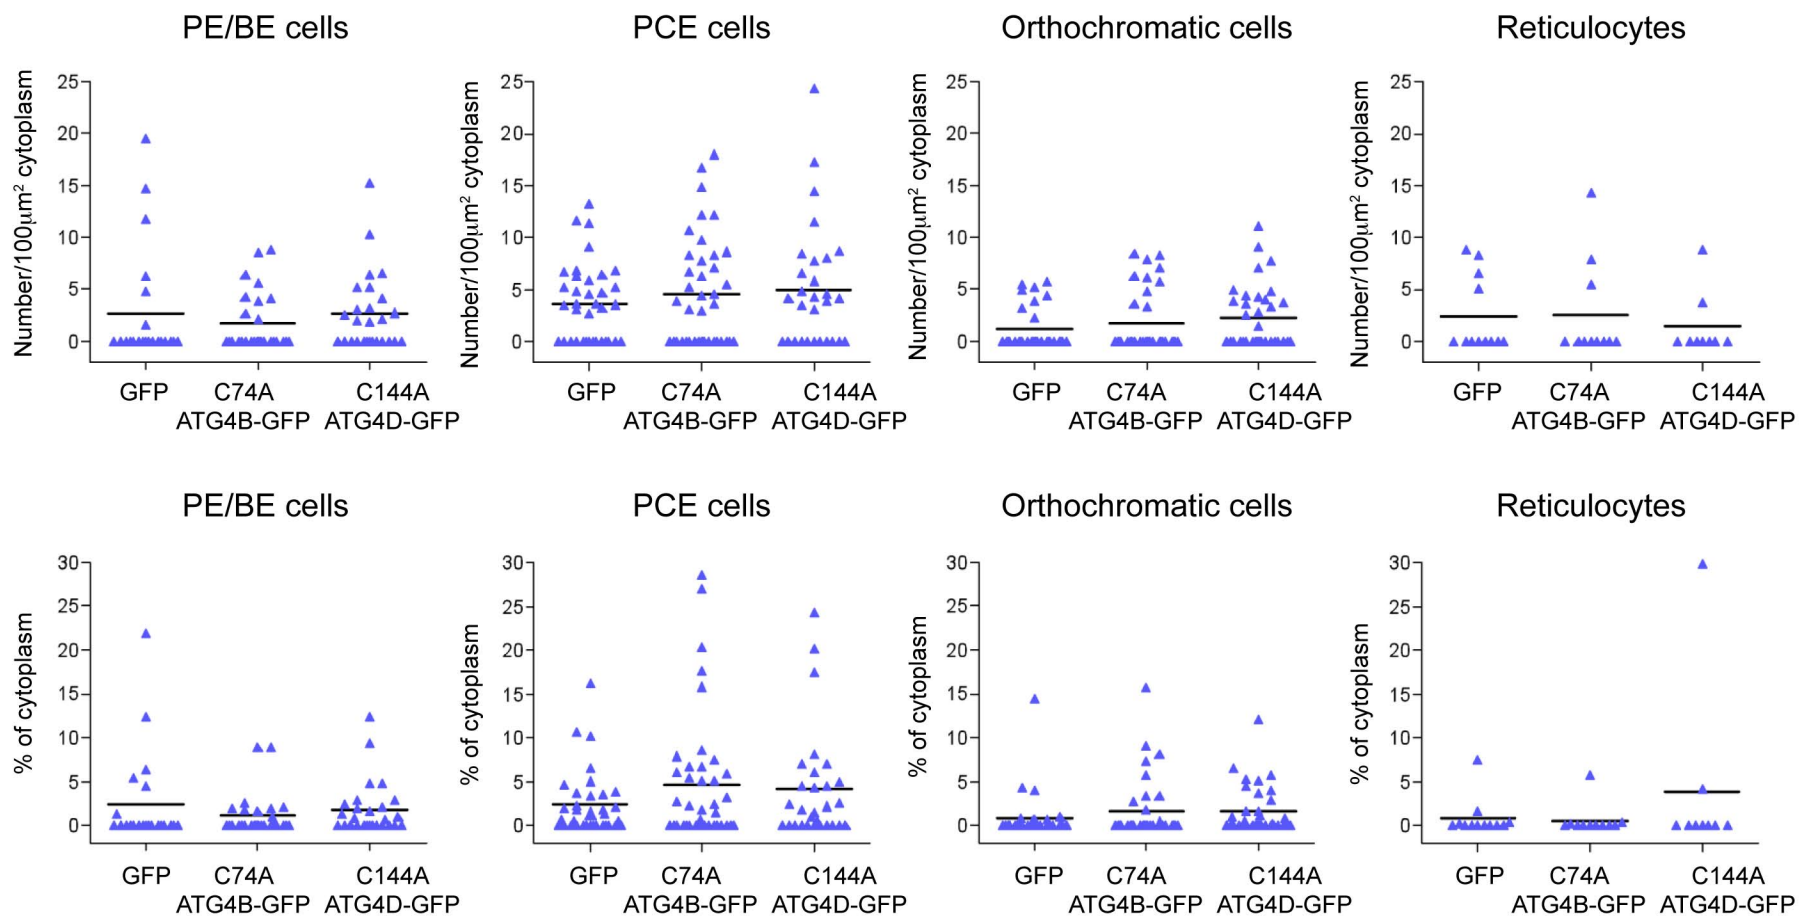



## Lysosomes

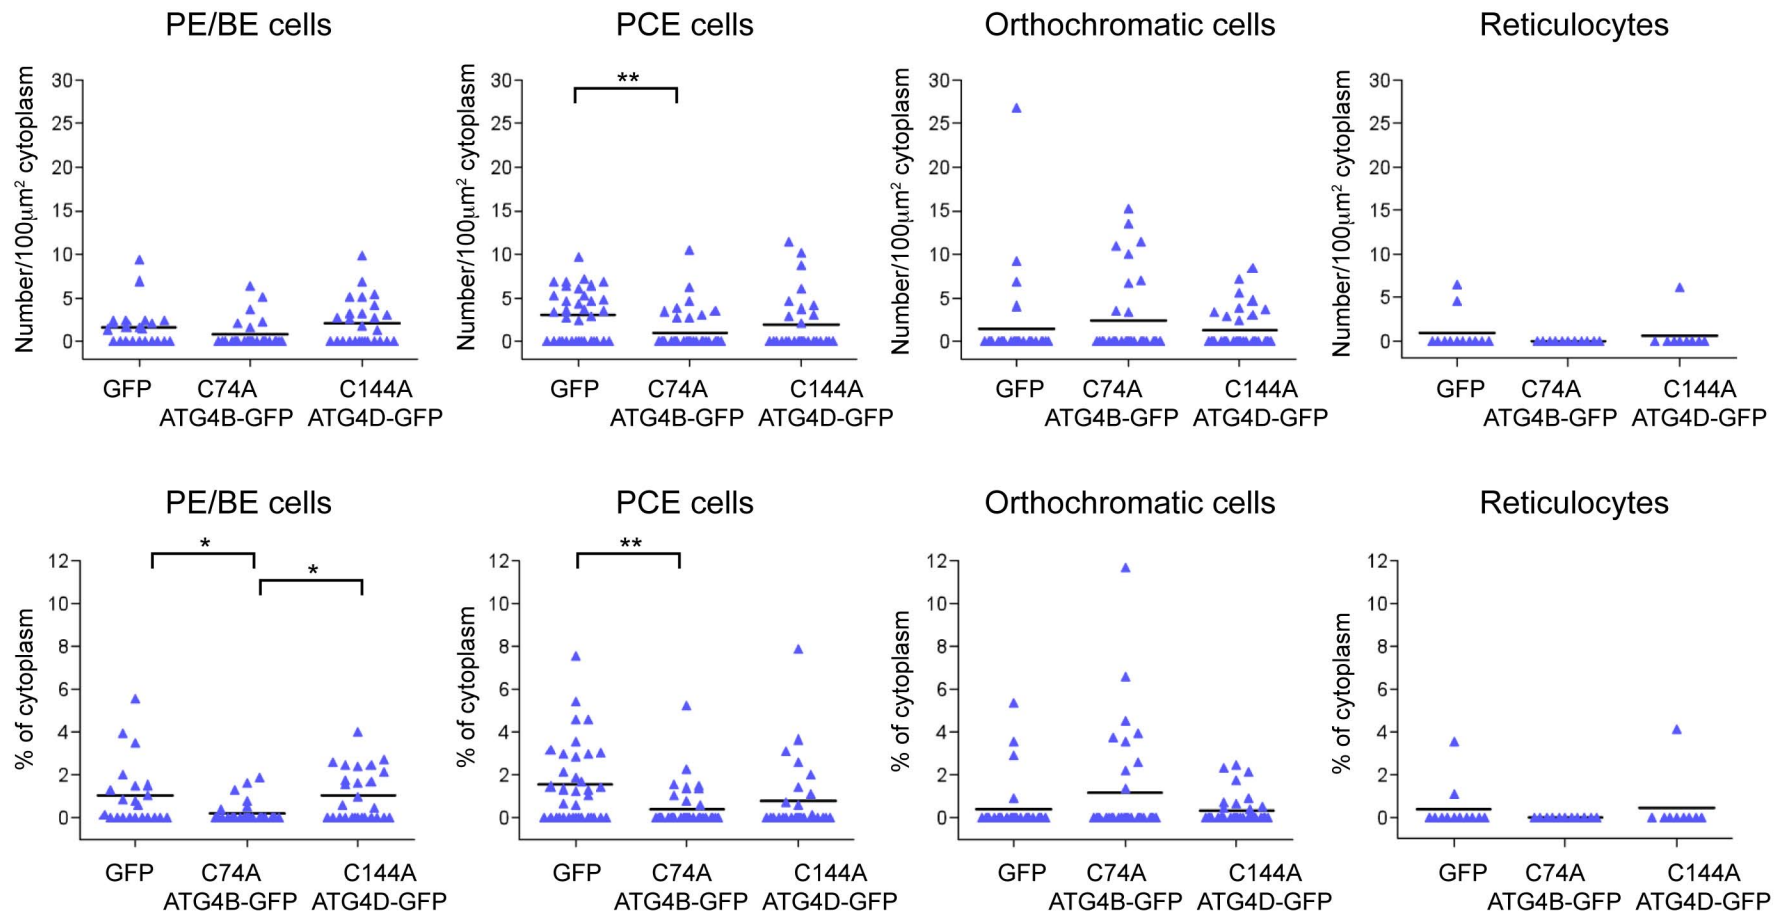

**Figure S1.** Erythroid terminal differentiation protocols for 5 different cultures from primary human CD34<sup>+</sup> cells. Cultures to the left (/031008, /150909) were obtained using an early culture system (following 5 days culture in expansion medium); those to the right (/130410, /060111, /100311) included an extended expansion step (10 days expansion, including 7 days with dexamethasone). This approach produced more uniform cultures with fewer cells stalled at the PCE stage.

**Figure S2.** Transcriptional regulation of autophagy genes during human erythroid differentiation in vitro. (A-D) qRT-PCR analysis of RNA samples collected at 2 day intervals before (-2) and after switch to differentiation media (day 0). Results are expressed as fold-increase compared to day 0. Histograms represent the means  $\pm$  s.d. of 3 independent experiments (for *TFRC*, *BNIP3L*, *GABARAP* and *ATG4C*) or 4 independent experiments (for all the other genes tested). (E) Expression of selected transcripts in cells maintained in expansion medium was compared with expression of cells triggered to terminally differentiate. Values are expressed as a fold-increase in expression using data at day 0 as reference.

**Figure S3.** Analysis of organelle populations in 3 independent erythroid cultures. Bars show organelle number/100  $\mu\text{m}^2$  cytoplasmic area (top) and % cytoplasmic occupancy (bottom) of autophagosomes, MVBs and lysosomes in 3 separate cultures. Data were obtained by quantitative morphometric analysis of high pressure frozen samples imaged by electron microscopy. Mitochondrial density for cultures "2" and "3" are also shown. PCE, orthochromatic and reticulocyte stages only are shown.

**Figure S4.** Pre-sorting flow cytometry analysis of erythroid progenitor cell populations transduced with GFP, GFP-ATG4B<sup>C74A</sup> or GFP-ATG4D<sup>C144A</sup> lentiviruses. (A) Flow cytometric analysis of transduced erythroid progenitors prior to cell sorting at day 7 of culture. GFP alone (green line), GFP-ATG4B<sup>C74A</sup> (blue line), GFP-ATG4D<sup>C144A</sup> (orange line), and non-transduced controls (red line). (B) Unaltered cellular volume (forward scatter: FSC) and granularity (side scatter: SSC) in erythroid

progenitors expressing GFP-tagged proteins (in red) compared to non-expressing cells (in black).

(C) A population of progenitor cells positive for GFP (FL1-FITC530B) was selected in each culture (gated population in red) and sorted from non-expressing or weakly expressing cells (in black).

**Figure S5.** Cross sectional surface area and endocytic pit density in human erythroid cells overexpressing GFP, C74A GFP-ATG4B<sup>C74A</sup> or GFP-ATG4D<sup>C144A</sup>. Number of cells analysed respectively in PE/BE, PCE, orthochromatic and reticulocyte stages: GFP – 22, 36, 31, 12; GFP-ATG4B<sup>C74A</sup> – 28, 40, 35, 11; GFP-ATG4D<sup>C144A</sup> – 27, 29, 35, 9. Black bars represent the means. Tukey's multiple comparison test: \*  $p \leq 0.05$ ; \*\*  $p \leq 0.01$ ; \*\*\*  $p \leq 0.001$ .

**Figure S6.** Numbers and cytoplasmic volume occupancy of amphisomes in human erythroid cells overexpressing GFP, GFP-ATG4B<sup>C74A</sup> or GFP-ATG4D<sup>C144A</sup>. Number of cells analysed respectively in PE/BE, PCE, orthochromatic and reticulocyte stages: GFP – 22, 36, 31, 12; GFP-ATG4B<sup>C74A</sup> – 28, 40, 35, 11; GFP-ATG4D<sup>C144A</sup> – 27, 29, 35, 9. Black bars represent the means. Tukey's multiple comparison test: \*  $p \leq 0.05$ ; \*\*  $p \leq 0.01$ ; \*\*\*  $p \leq 0.001$ .

**Figure S7.** Numbers and cytoplasmic volume occupancy of lysosomes in human erythroid cells overexpressing GFP, GFP-ATG4B<sup>C74A</sup> or GFP-ATG4D<sup>C144A</sup>. Number of cells analysed respectively in PE/BE, PCE, orthochromatic and reticulocyte stages: GFP – 22, 36, 31, 12; GFP-ATG4B<sup>C74A</sup> – 28, 40, 35, 11; GFP-ATG4D<sup>C144A</sup> – 27, 29, 35, 9. Black bars represent the means. Tukey's multiple comparison test: \*  $p \leq 0.05$ ; \*\*  $p \leq 0.01$ ; \*\*\*  $p \leq 0.001$ .
